# Supplementary material for: Sesamin prevents apoptosis and inflammation after experimental myocardial infarction by JNK and NF-κB pathways
Source: Royal Society of Chemistry journal article supplement (doi:10.1039/c7fo00204a), 2017-01-01
Supplement: c7fo00204a1.pdf [file c7fo00204a1.pdf]

**SUPPLEMENTAL MATERIAL**

**Table S1: Primer sequences used for RT-PCR**

| Gene   | Species |         | Sequence(5'-3')               |
|--------|---------|---------|-------------------------------|
| GAPDH  | Mouse   | Forward | ACTCCACTCACGGCAAATTC          |
|        |         | Reverse | TCTCCATGGTGGTGAAGACA          |
| ANP    | Mouse   | Forward | ACCTGCTAGACCACCTGGAG          |
|        |         | Reverse | CCTTGGCTGTTATCTTCGGTACCG<br>G |
| BNP    | Mouse   | Forward | AAGGGAGAACACGGCATCATTG        |
|        |         | Reverse | TGGATCTCCTGAAGGTGCTGT         |
| β-MHC  | Mouse   | Forward | CCGAGTCCCAGGTCAACAA           |
|        |         | Reverse | CTTCACGGGCACCCTTGGA           |
| IL-10  | Mouse   | Forward | TGCAGGACTTTAAGGGTACTTGG       |
|        |         | Reverse | GGCCTTGTAGACACCTTGGTC         |
| IL-6   | Mouse   | Forward | CACGGCCTTCCCTACTTCAC          |
|        |         | Reverse | TGCAAGTGCATCATCGTTGT          |
| TNF- α | Mouse   | Forward | AAGCCTGTAGCCCACGTCGTA         |
|        |         | Reverse | GGCACCCTAGTTGGTTGTCTTTG       |

**Table S2: The information of the primary antibodies used in western**

| Antibody name    | Company                   | Number  | Dilution |
|------------------|---------------------------|---------|----------|
| GAPDH            | Cell Signaling Technology | 2118    | 1:1000   |
| Bax              | Cell Signaling Technology | 2722    | 1:1000   |
| Bcl-2            | Cell Signaling Technology | 2870    | 1:1000   |
| Cleaved-caspase3 | Cell Signaling Technology | 9165P   | 1:1000   |
| caspase3         | Cell Signaling Technology | 9662P   | 1:1000   |
| P-NFκBp65        | Cell Signaling Technology | 3033    | 1:1000   |
| T-NFκBp65        | Cell Signaling Technology | 8242    | 1:1000   |
| P-IκBα           | Abcam                     | ab12135 | 1:1000   |
| T-IκBα           | Abcam                     | ab59195 | 1:1000   |
| P-JNK            | Cell Signaling Technology | 4668P   | 1:1000   |
| T-JNK            | Cell Signaling Technology | 9258    | 1:1000   |
| P-c-Jun          | Cell Signaling Technology | 3270P   | 1:1000   |
| c-Jun            | Cell Signaling Technology | 9165P   | 1:1000   |
| SOD-1            | Abcam                     | ab13498 | 1:1000   |
| SOD-2            | Abcam                     | ab13533 | 1:1000   |
